# Supplementary material
Source: publisher figshare collection journal article supplement (https://plos.figshare.com/articles/dataset/_/129549)
Supplement: Supplementary file [file 1]

Table S1: Number of patients with a report of cancer (number of cancer deaths), by site and trial

| Study                                      | Any cancer   | Gastrointestinal cancer | Genitourinary cancer | Respiratory cancer | Female Breast cancer | Haematological cancer | Melanoma | Neurological cancer | Other known site | Unspecified |
|--------------------------------------------|--------------|-------------------------|----------------------|--------------------|----------------------|-----------------------|----------|---------------------|------------------|-------------|
| Statin vs. control                         |              |                         |                      |                    |                      |                       |          |                     |                  |             |
| SSSS                                       | 185 (68)     | 52 (22)                 | 61 (10)              | 31 (22)            | 8 (1)                | 16 (8)                | 11 (2)   | 1 (1)               | 3 (1)            | 2 (1)       |
| WOSCOPS                                    | 210 (93)     | 76 (32)                 | 58 (9)               | 45 (37)            | 0 (0)                | 9 (3)                 | 0 (0)    | 7 (5)               | 6 (0)            | 9 (7)       |
| CARE                                       | 307 (94)     | 64 (25)                 | 132 (6)              | 60 (44)            | 9 (0)                | 22 (8)                | 7 (0)    | 6 (6)               | 4 (3)            | 3 (2)       |
| Post CABG                                  | 44 (0)       | 2 (0)                   | 30 (0)               | 3 (0)              | 1 (0)                | 0 (0)                 | 0 (0)    | 0 (0)               | 0 (0)            | 8 (0)       |
| AFCAPS/TexCaps                             | 481 (83)     | 61 (21)                 | 243 (8)              | 47 (26)            | 21 (1)               | 46 (13)               | 42 (3)   | 6 (6)               | 9 (1)            | 6 (4)       |
| LIPID                                      | 793 (269)    | 172 (68)                | 305 (33)             | 115 (78)           | 17 (0)               | 56 (22)               | 52 (8)   | 16 (14)             | 11 (3)           | 49 (43)     |
| GISSI-P                                    | 39 (21)      | 9 (5)                   | 8 (2)                | 13 (10)            | 1 (0)                | 5 (3)                 | 1 (0)    | 1 (0)               | 1 (1)            | 0 (0)       |
| LIPS                                       | 73 (30)      | 22 (10)                 | 18 (4)               | 16 (7)             | 3 (0)                | 5 (0)                 | 0 (0)    | 3 (3)               | 4 (4)            | 2 (2)       |
| HPS                                        | 1566 (702)   | 441 (217)               | 506 (100)            | 328 (257)          | 83 (10)              | 91 (40)               | 26 (4)   | 15 (12)             | 12 (2)           | 64 (60)     |
| PROSPER                                    | 436 (206)    | 124 (65)                | 115 (23)             | 88 (65)            | 25 (0)               | 19 (8)                | 11 (1)   | 4 (4)               | 7 (7)            | 43 (33)     |
| ALLHAT-LLT                                 | 747 (311)    | 83 (30)                 | 197 (27)             | 135 (92)           | 70 (11)              | 0 (0)                 | 0 (0)    | 0 (0)               | 228 (122)        | 34 (29)     |
| ASCOT-LLA                                  | 462 (160)    | 119 (57)                | 158 (25)             | 57 (31)            | 12 (1)               | 36 (17)               | 5 (2)    | 8 (5)               | 10 (0)           | 57 (22)     |
| ALERT                                      | 156 (70)     | 27 (15)                 | 40 (6)               | 16 (11)            | 15 (2)               | 22 (11)               | 7 (2)    | 2 (2)               | 8 (4)            | 19 (17)     |
| CARDS                                      | 119 (50)     | 30 (10)                 | 23 (4)               | 12 (5)             | 14 (0)               | 4 (1)                 | 2 (0)    | 1 (1)               | 2 (1)            | 31 (28)     |
| ALLIANCE                                   | 149 (44)     | 9 (3)                   | 13 (1)               | 10 (10)            | 3 (0)                | 2 (1)                 | 0 (0)    | 1 (0)               | 0 (0)            | 111 (29)    |
| 4D                                         | 94 (38)      | 32 (20)                 | 13 (2)               | 7 (4)              | 8 (1)                | 6 (2)                 | 3 (1)    | 0 (0)               | 4 (0)            | 21 (8)      |
| ASPEN                                      | 127 (38)     | 30 (11)                 | 48 (4)               | 17 (12)            | 7 (0)                | 3 (1)                 | 6 (1)    | 0 (0)               | 3 (0)            | 13 (9)      |
| MEGA                                       | 260 (61)     | 128 (33)                | 55 (9)               | 23 (9)             | 24 (0)               | 11 (3)                | 0 (0)    | 3 (1)               | 10 (0)           | 6 (6)       |
| GISSI-HF                                   | 245 (143)    | 91 (50)                 | 40 (12)              | 58 (48)            | 7 (0)                | 0 (0)                 | 1 (0)    | 10 (9)              | 0 (0)            | 38 (24)     |
| JUPITER                                    | 527 (91)     | 135 (31)                | 161 (8)              | 72 (27)            | 44 (1)               | 50 (8)                | 25 (2)   | 6 (3)               | 18 (4)           | 16 (7)      |
| AURORA                                     | 170 (50)     | 46 (16)                 | 46 (8)               | 28 (12)            | 9 (2)                | 14 (3)                | 5 (0)    | 2 (2)               | 7 (0)            | 13 (7)      |
| CORONA                                     | 303 (101)    | 96 (34)                 | 74 (12)              | 61 (27)            | 9 (0)                | 20 (10)               | 3 (0)    | 2 (2)               | 7 (1)            | 31 (15)     |
| Subtotal: All 22 statin vs. control trials | 7493 (2723)  | 1849 (775)              | 2344 (313)           | 1242 (834)         | 390 (30)             | 437 (162)             | 207 (26) | 94 (76)             | 354 (154)        | 576 (353)   |
| More vs. less statin                       |              |                         |                      |                    |                      |                       |          |                     |                  |             |
| PROVE-IT                                   | 134 (25)     | 39 (5)                  | 32 (1)               | 18 (11)            | 9 (0)                | 7 (0)                 | 0 (0)    | 1 (1)               | 15 (2)           | 13 (5)      |
| A to Z                                     | 70 (20)      | 20 (7)                  | 21 (4)               | 16 (4)             | 3 (0)                | 0 (0)                 | 0 (0)    | 1 (1)               | 2 (1)            | 7 (3)       |
| TNT                                        | 684 (160)    | 115 (33)                | 280 (18)             | 82 (52)            | 30 (1)               | 39 (21)               | 29 (0)   | 2 (0)               | 11 (7)           | 96 (28)     |
| IDEAL                                      | 748 (211)    | 125 (57)                | 190 (38)             | 101 (72)           | 37 (2)               | 25 (14)               | 14 (3)   | 9 (8)               | 13 (1)           | 234 (16)    |
| SEARCH                                     | 1302 (512)   | 311 (133)               | 453 (86)             | 233 (164)          | 48 (8)               | 106 (41)              | 55 (7)   | 17 (14)             | 23 (10)          | 56 (49)     |
| Subtotal: All 5 more vs. less trials       | 2938 (928)   | 610 (235)               | 976 (147)            | 450 (303)          | 127 (11)             | 177 (76)              | 98 (10)  | 30 (24)             | 64 (21)          | 406 (101)   |
| Total                                      | 10431 (3651) | 2459 (1010)             | 3320 (460)           | 1692 (1137)        | 517 (41)             | 614 (238)             | 305 (36) | 124 (100)           | 418 (175)        | 982 (454)   |

ICD-9 cancer codes: All cancer (140-209 excluding 173); Gastrointestinal (140-159); Genitourinary (179-189); Respiratory (160-163,165); Female breast (174); Haematological (200-208); Melanoma (172); Neurological (191,192); Other known site (164,170,171,175,176,190,193-195); Unspecified (196-199, 209). If the ICD9 cause of death was 173 or 210-239 then both cancer incidence and cancer death was coded as unknown cancer.
