# Supplementary material
Source: publisher figshare collection journal article supplement (https://plos.figshare.com/articles/dataset/_/129549)
Supplement: Supplementary file [file 1]

Table S2: Cancer incidence and cancer mortality by site, in 22 trials of statin vs. control and 5 trials of more vs. less statin

|                                | Statin vs. control (22 trials) |                      |                    |                     |                      |                    | More vs. Less statin (5 trials) |                   |                    |                   |                   |                    |
|--------------------------------|--------------------------------|----------------------|--------------------|---------------------|----------------------|--------------------|---------------------------------|-------------------|--------------------|-------------------|-------------------|--------------------|
|                                | Cancer incidence               |                      |                    | Cancer mortality    |                      |                    | Cancer incidence                |                   |                    | Cancer mortality  |                   |                    |
|                                | Statin<br>(n=67258)            | Control<br>(n=67279) | Nominal<br>p value | Statin<br>(n=67258) | Control<br>(n=67279) | Nominal<br>p value | More<br>(n=19829)               | Less<br>(n=19783) | Nominal<br>p value | More<br>(n=19829) | Less<br>(n=19783) | Nominal<br>p value |
| Total follow-up (person years) | 268847                         | 267933               |                    | 274479              | 273707               |                    | 90734                           | 90830             |                    | 93456             | 93439             |                    |
| Site of Cancer                 |                                |                      |                    |                     |                      |                    |                                 |                   |                    |                   |                   |                    |
| Gastrointestinal               | 926                            | 923                  | 0.99               | 395                 | 380                  | 0.68               | 288                             | 322               | 0.18               | 108               | 127               | 0.24               |
| Lip, mouth or pharynx          | 49                             | 52                   | 0.82               | 8                   | 13                   | 0.38               | 19                              | 14                | 0.49               | 2                 | 2                 | 1.00               |
| Oesophageal                    | 61                             | 62                   | 0.97               | 33                  | 39                   | 0.54               | 20                              | 21                | 1.00               | 12                | 16                | 0.57               |
| Stomach                        | 92                             | 100                  | 0.61               | 50                  | 45                   | 0.71               | 26                              | 24                | 0.89               | 14                | 9                 | 0.40               |
| Large bowel or intestine       | 445                            | 448                  | 0.89               | 124                 | 134                  | 0.54               | 104                             | 119               | 0.35               | 24                | 31                | 0.41               |
| Liver                          | 35                             | 33                   | 0.93               | 24                  | 24                   | 1.00               | 7                               | 18                | 0.05               | 4                 | 8                 | 0.39               |
| Gall bladder or bile-ducts     | 19                             | 21                   | 0.86               | 17                  | 14                   | 0.74               | 7                               | 9                 | 0.80               | 5                 | 6                 | 1.00               |
| Pancreas                       | 84                             | 74                   | 0.49               | 66                  | 52                   | 0.25               | 22                              | 22                | 1.00               | 16                | 19                | 0.74               |
| Other gastrointestinal         | 141                            | 133                  | 0.72               | 73                  | 59                   | 0.27               | 83                              | 95                | 0.41               | 31                | 36                | 0.63               |
| Genitourinary                  | 1164                           | 1180                 | 0.66               | 145                 | 168                  | 0.19               | 480                             | 496               | 0.65               | 77                | 70                | 0.62               |
| Prostate                       | 671                            | 685                  | 0.64               | 65                  | 76                   | 0.38               | 252                             | 269               | 0.49               | 39                | 31                | 0.40               |
| Penis/Scrotum                  | 72                             | 58                   | 0.28               | 4                   | 3                    | 1.00               | 68                              | 65                | 0.85               | 0                 | 0                 | n/a                |
| Uterus                         | 51                             | 46                   | 0.68               | 6                   | 8                    | 0.78               | 6                               | 14                | 0.12               | 1                 | 0                 | 1.00               |
| Ovarian                        | 29                             | 30                   | 1.00               | 10                  | 12                   | 0.83               | 6                               | 6                 | 1.00               | 4                 | 4                 | 1.00               |
| Other genitourinary            | 12                             | 13                   | 0.99               | 2                   | 1                    | 0.99               | 5                               | 1                 | 0.22               | 3                 | 1                 | 0.62               |
| Bladder                        | 211                            | 228                  | 0.41               | 34                  | 41                   | 0.46               | 104                             | 103               | 0.99               | 15                | 23                | 0.25               |
| Kidney                         | 118                            | 120                  | 0.91               | 24                  | 27                   | 0.75               | 39                              | 38                | 1.00               | 15                | 11                | 0.55               |
| Respiratory                    | 614                            | 628                  | 0.65               | 404                 | 430                  | 0.34               | 231                             | 219               | 0.60               | 149               | 154               | 0.82               |
| Trachea/Lung                   | 562                            | 559                  | 1.00               | 384                 | 405                  | 0.43               | 147                             | 146               | 1.00               | 78                | 90                | 0.40               |
| Other respiratory              | 52                             | 69                   | 0.13               | 20                  | 25                   | 0.52               | 84                              | 73                | 0.42               | 71                | 64                | 0.60               |
| Female breast                  | 200                            | 190                  | 0.67               | 18                  | 12                   | 0.36               | 73                              | 54                | 0.11               | 6                 | 5                 | 0.99               |
| Haematological                 | 218                            | 219                  | 0.94               | 78                  | 84                   | 0.66               | 95                              | 82                | 0.36               | 40                | 36                | 0.72               |
| Melanoma                       | 104                            | 103                  | 1.00               | 13                  | 13                   | 1.00               | 56                              | 42                | 0.19               | 4                 | 6                 | 0.75               |
| Other/unspecified              | 529                            | 495                  | 0.34               | 312                 | 271                  | 0.11               | 243                             | 257               | 0.58               | 63                | 83                | 0.11               |
| Neurological                   | 53                             | 41                   | 0.27               | 43                  | 33                   | 0.32               | 14                              | 16                | 0.86               | 12                | 12                | 1.00               |
| Other known site               | 190                            | 164                  | 0.18               | 89                  | 65                   | 0.06               | 29                              | 35                | 0.53               | 5                 | 16                | 0.03               |
| Unspecified                    | 286                            | 290                  | 0.83               | 180                 | 173                  | 0.81               | 200                             | 206               | 0.83               | 46                | 55                | 0.42               |
| All cancer                     | 3755                           | 3738                 | 0.99               | 1365                | 1358                 | 0.99               | 1466                            | 1472              | 0.96               | 447               | 481               | 0.28               |

ICD-9 cancer codes: Gastrointestinal (140-159); Lip, mouth or pharynx (140-149); Oesophageal (150); Stomach (151); Large bowel or intestine (152-154); Liver (155); Gall bladder or bile-ducts (156); Pancreas (157); Other gastrointestinal (158,159); Genitourinary (179-189); Prostate (185); Penis/Scrotum (187); Uterus (179,180,182); Ovarian (183); Other genitourinary (181,184,186); Bladder (188); Kidney (189); Respiratory (160-163,165); Trachea/Lung (162); Other respiratory (160,161,163,165); Female breast (174); Haematological (200-208); Melanoma (172); Other/unspecified ([Neurological (191,192); Other known site (164,170,171,175,176,190,193-195); Unspecified (196-199, 209)]); All cancer (140-209 excluding 173). If the ICD9 cause of death was 173 or 210-239 then both cancer incidence and cancer death was coded as unknown cancer.
