# Supplementary material
Source: publisher figshare collection journal article supplement (https://plos.figshare.com/articles/dataset/_/129549)

**Figure S6: Effects of statin therapy on CANCER MORTALITY, by age and sex**

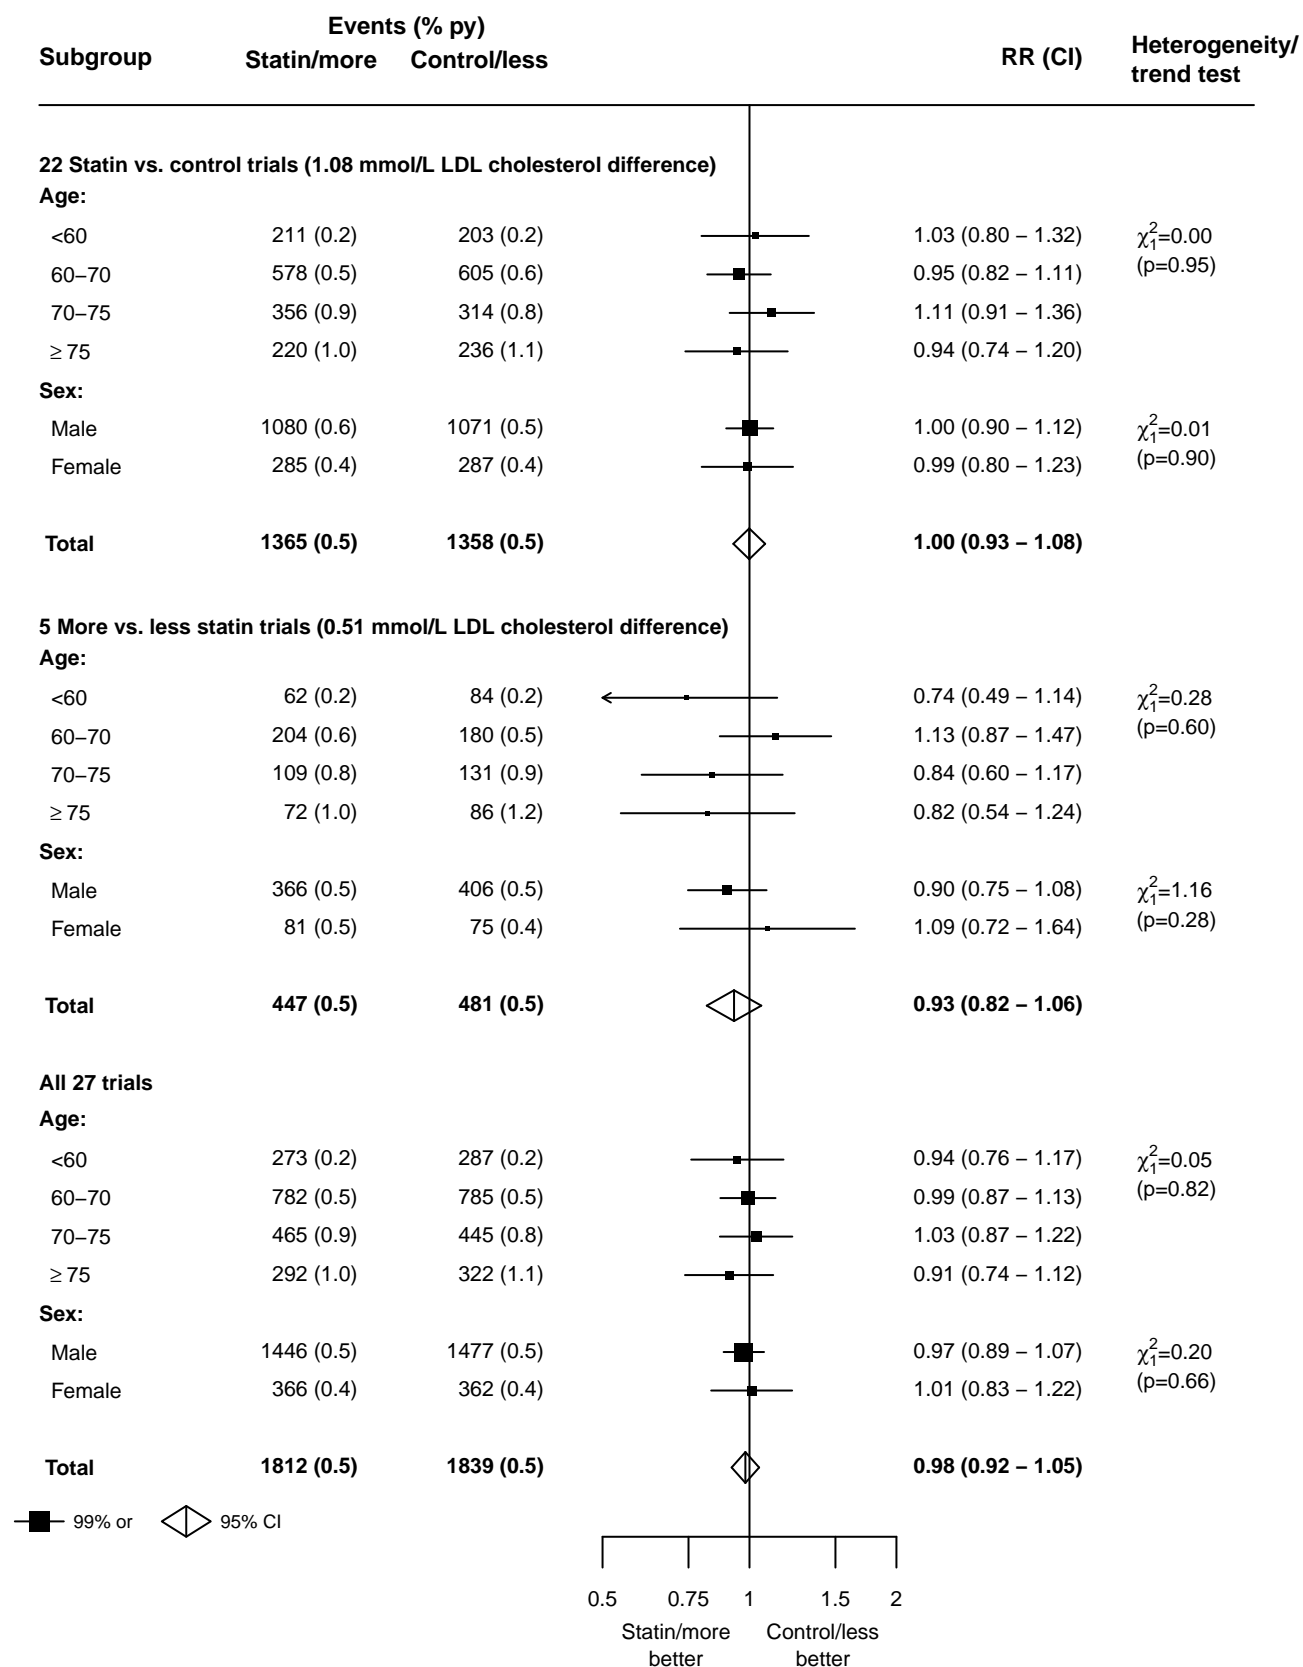

Supplement: Supplementary file [file 1]
