# Supplementary material
Source: publisher figshare collection journal article supplement (https://plos.figshare.com/articles/dataset/_/129549)
Supplement: Supplementary file [file 1]

Figure S10: Effects of statin therapy on CANCER MORTALITY in 22 statin vs. control trials, by type of statin

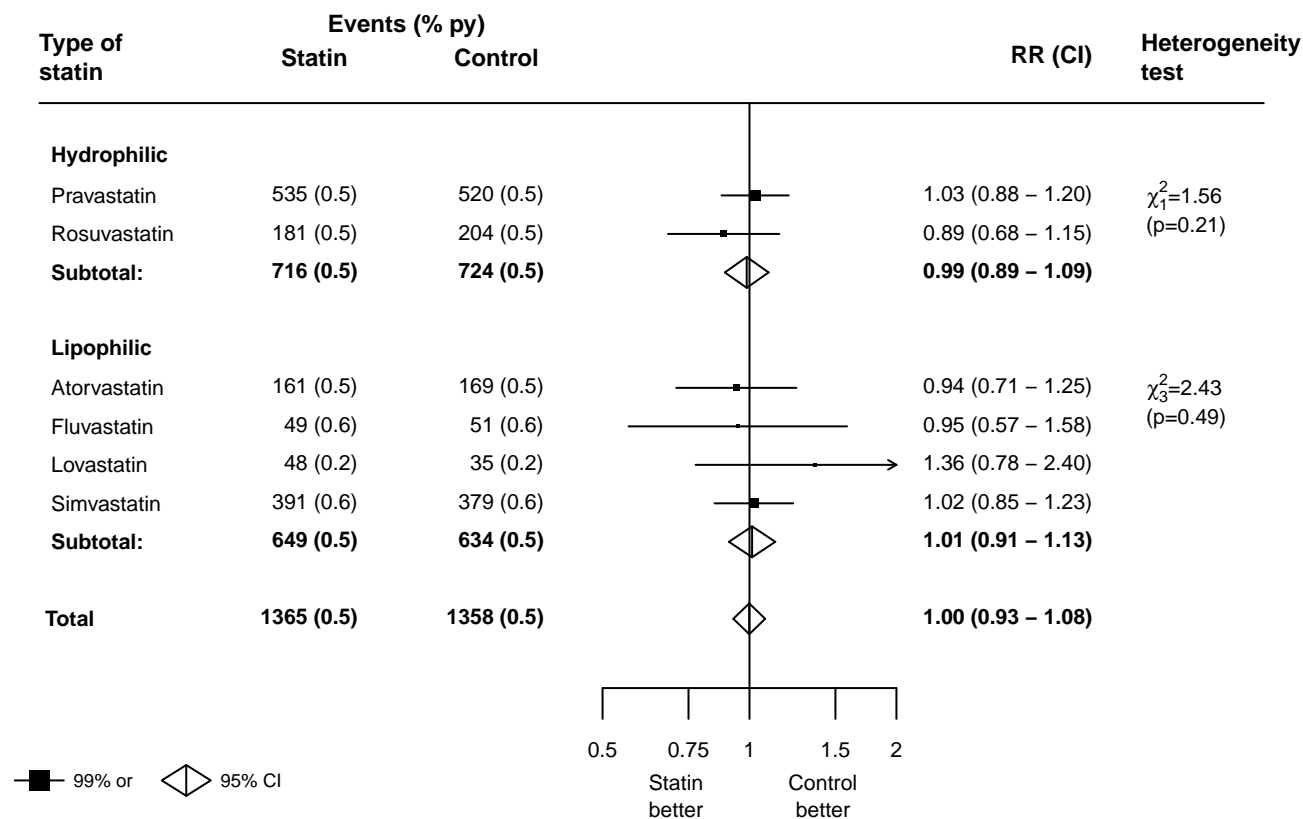

Heterogeneity between hydrophilic and lipophilic statins:  $\chi^2_1 = 0.11$  (p=0.74)
