# Supplementary material
Source: publisher figshare collection journal article supplement (https://plos.figshare.com/articles/dataset/_/129549)

**Figure S7: Effects of statin therapy on CANCER INCIDENCE, by other baseline characteristics**

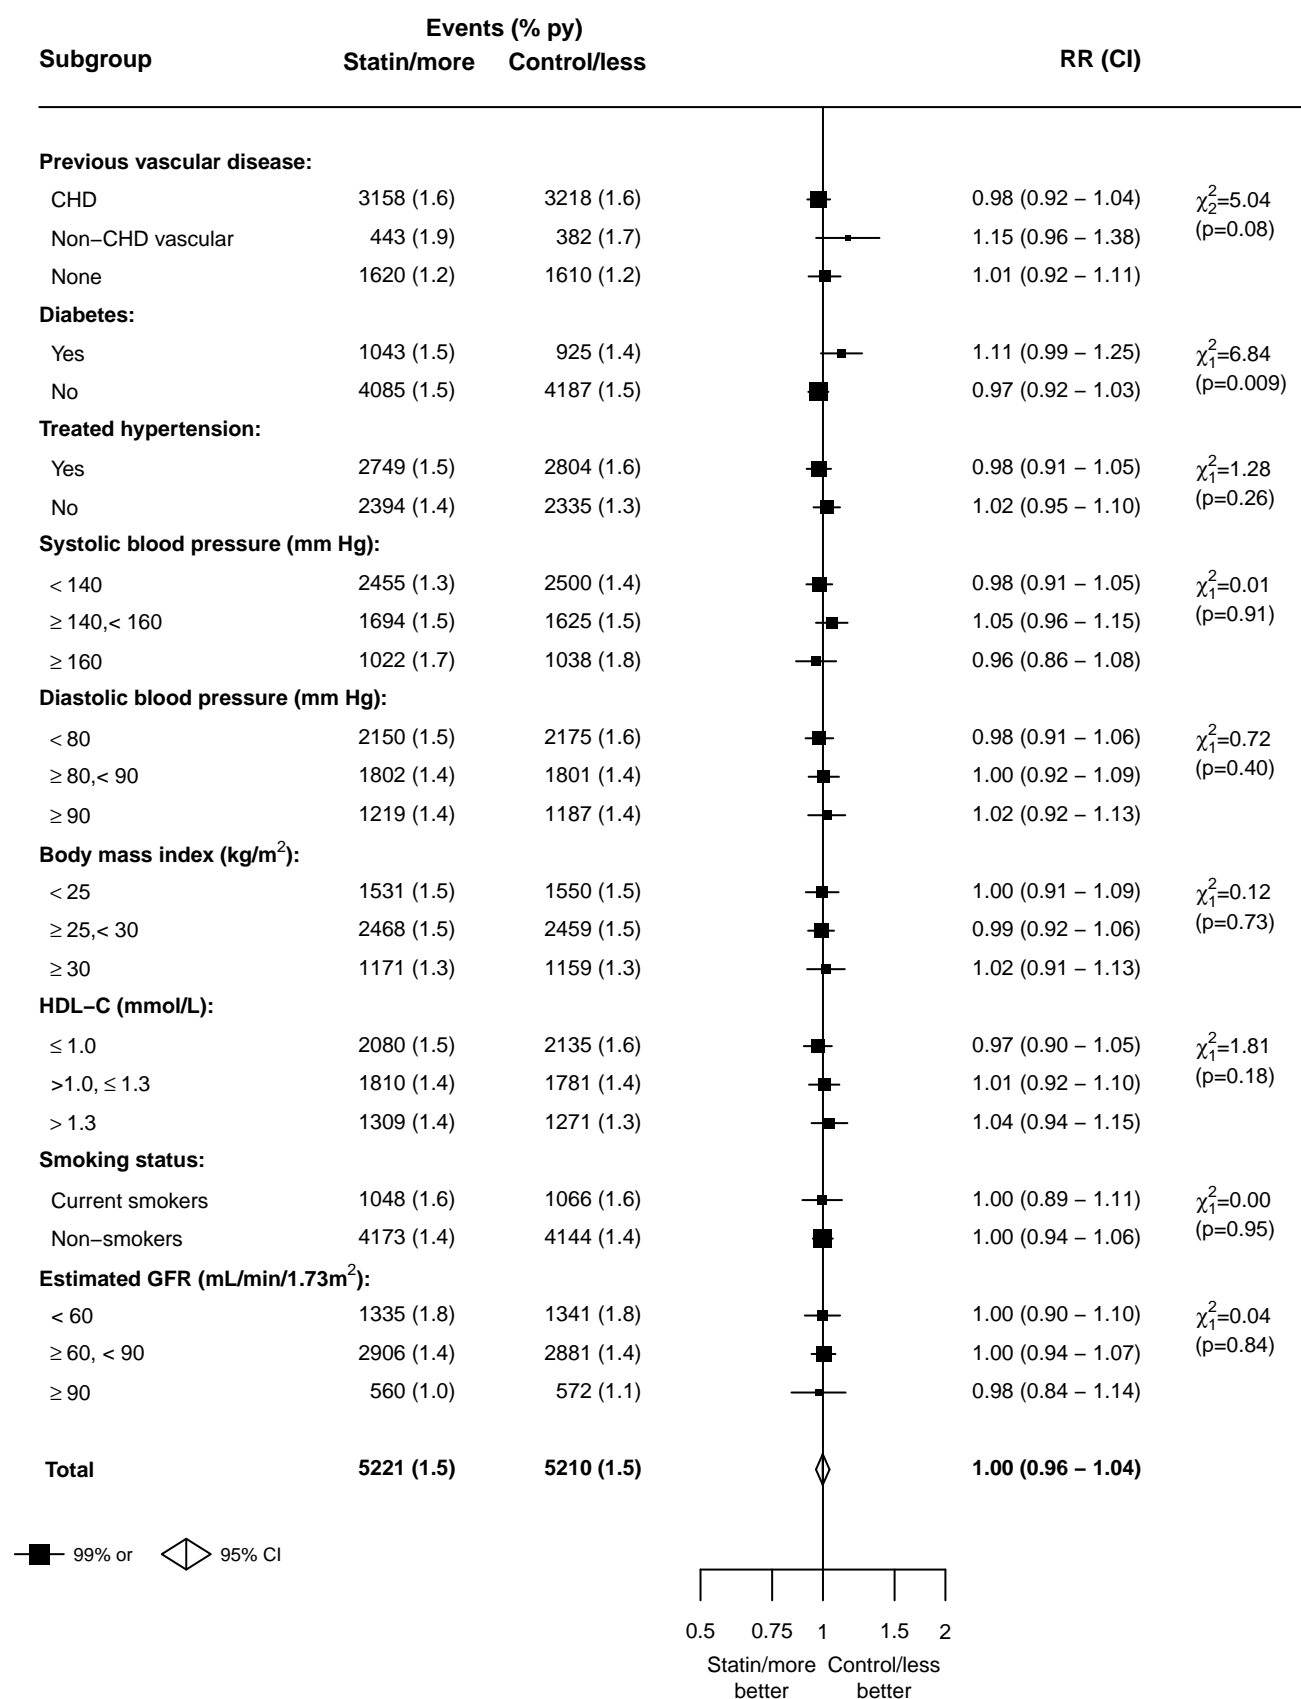

Supplement: Supplementary file [file 1]
